# Supplementary material for: The Mental Health Recovery Measure Can Be Used to Assess Aspects of Both Customer-Based and Service-Based Recovery in the Context of Severe Mental Illness
Source: PubMed Central journal article supplement (PMC5093119; doi:10.3389/fpsyg.2016.01679), 2016-11-03
Supplement: Table_2.pdf [file Table_2.pdf]

**Supplementary Table 2. Item-total correlations in the original MHRM scale.**

Pearson's  $r$  correlation coefficient for each of the 30 items in the original MHRM scale, relative to the total score and each of the 8 domains. Items with item-total correlation relative to the total score less than 0.4 are underlined.

| Domain/Item                                                                          | Item-Total Correlation (r) |              |
|--------------------------------------------------------------------------------------|----------------------------|--------------|
|                                                                                      | Domain                     | Total        |
| <b>A. Overcoming stuckness</b>                                                       |                            |              |
| 1. I work hard toward my mental health recovery.                                     | 0.44                       | 0.51         |
| 2. Even though there are hard days, things are improving for me.                     | 0.4                        | 0.6          |
| 3. I ask for help when I am not feeling well.                                        | <u>0.35</u>                | <u>0.39</u>  |
| 4. I take risks to move forward with my recovery.                                    | 0.5                        | 0.54         |
| <b>B. Self-empowerment</b>                                                           |                            |              |
| 5. I believe in myself.                                                              | 0.34                       | 0.48         |
| 6. I have control over my mental health problems.                                    | 0.45                       | 0.46         |
| 7. I am in control of my life.                                                       | 0.62                       | 0.58         |
| 8. I socialize and make friends.                                                     | 0.23                       | 0.44         |
| <b>C. Learning and self-redefinition</b>                                             |                            |              |
| 9. Every day is a new opportunity for learning.                                      | 0.59                       | 0.68         |
| 10. I still grow and change in positive ways despite my mental health problems.      | 0.6                        | 0.68         |
| 11. Even though I may still have problems, I value myself as a person of worth.      | 0.64                       | 0.53         |
| 12. I understand myself and have a good sense of who I am.                           | 0.67                       | 0.55         |
| <b>D. Basic functioning</b>                                                          |                            |              |
| 13. I eat nutritious meals every day.                                                | <u>0.19</u>                | <u>-0.03</u> |
| 14. I go out and participate in enjoyable activities every week.                     | 0.27                       | 0.43         |
| 15. I make the effort to get to know other people.                                   | 0.38                       | 0.53         |
| 16. I am comfortable with my use of prescribed medications.                          | <u>-0.01</u>               | <u>0.06</u>  |
| <b>F. Overall well-being</b>                                                         |                            |              |
| 17. I feel good about myself.                                                        | 0.67                       | 0.5          |
| 18. The way I think about things helps me to achieve my goals.                       | 0.37                       | 0.63         |
| 19. My life is pretty normal.                                                        | 0.54                       | 0.47         |
| 20. I feel at peace with myself.                                                     | 0.41                       | 0.43         |
| <b>G. New potentials</b>                                                             |                            |              |
| 21. I maintain a positive attitude for weeks at a time.                              | 0.56                       | 0.59         |
| 22. My quality of life will get better in the future.                                | 0.49                       | 0.52         |
| 23. Every day that I get up, I do something productive.                              | 0.51                       | 0.67         |
| 24. I am making progress towards my goals.                                           | 0.7                        | 0.65         |
| <b>H. Spirituality</b>                                                               |                            |              |
| 25. When I am feeling low, my religious faith or spirituality helps me feel better.  | 0.95                       | 0.19         |
| 26. My religious faith or spirituality supports my recovery.                         | 0.95                       | 0.23         |
| <b>I. Advocacy/enrichment</b>                                                        |                            |              |
| 27. I advocate for the rights of myself and others with mental health problems.      | 0.2                        | 0.39         |
| 28. I engage in work or other activities that enrich myself and the world around me. | 0.4                        | 0.63         |
| 29. I cope effectively with stigma associated with having a mental health problem.   | 0.33                       | 0.38         |
| 30. I have enough money to spend on extra things or activities that enrich my life.  | <u>0.08</u>                | <u>-0.04</u> |
