# Supplementary material for: The Mental Health Recovery Measure Can Be Used to Assess Aspects of Both Customer-Based and Service-Based Recovery in the Context of Severe Mental Illness
Source: PubMed Central journal article supplement (PMC5093119; doi:10.3389/fpsyg.2016.01679), 2016-11-03
Supplement: Table_4.pdf [file Table_4.pdf]

**Supplementary Table 4. Item-total correlations in the revised MHRM scale.**

Pearson's  $r$  correlation coefficient for each of the 20 items in the revised MHRM scale, relative to the total score and each of the 6 domains.

| Domain/Item                                                                          | Correlation (r) |       |
|--------------------------------------------------------------------------------------|-----------------|-------|
|                                                                                      | Domain          | Total |
| <b>A. Empowerment</b>                                                                |                 |       |
| 6. I have control over my mental health problems.                                    | 0.65            | 0.49  |
| 7. I am in control of my life.                                                       | 0.65            | 0.61  |
| <b>B. Redefinition</b>                                                               |                 |       |
| 1. I work hard toward my mental health recovery.                                     | 0.56            | 0.53  |
| 9. Every day is a new opportunity for learning.                                      | 0.66            | 0.67  |
| 10. I still grow and change in positive ways despite my mental health problems.      | 0.65            | 0.69  |
| 23. Every day that I get up, I do something productive.                              | 0.59            | 0.65  |
| <b>C. Identity</b>                                                                   |                 |       |
| 11. Even though I may still have problems, I value myself as a person of worth.      | 0.71            | 0.54  |
| 12. I understand myself and have a good sense of who I am.                           | 0.71            | 0.6   |
| <b>D. Social functioning</b>                                                         |                 |       |
| 8. I socialize and make friends.                                                     | 0.66            | 0.47  |
| 14. I go out and participate in enjoyable activities every week.                     | 0.65            | 0.47  |
| 15. I make the effort to get to know other people.                                   | 0.73            | 0.54  |
| 28. I engage in work or other activities that enrich myself and the world around me. | 0.47            | 0.62  |
| <b>E. Overall well-being</b>                                                         |                 |       |
| 17. I feel good about myself.                                                        | 0.67            | 0.54  |
| 19. My life is pretty normal.                                                        | 0.53            | 0.48  |
| 20. I feel at peace with myself.                                                     | 0.43            | 0.4   |
| <b>F. Optimism</b>                                                                   |                 |       |
| 2. Even though there are hard days, things are improving for me.                     | 0.55            | 0.6   |
| 18. The way I think about things helps me to achieve my goals.                       | 0.64            | 0.66  |
| 21. I maintain a positive attitude for weeks at a time.                              | 0.63            | 0.61  |
| 22. My quality of life will get better in the future.                                | 0.57            | 0.51  |
| 24. I am making progress towards my goals.                                           | 0.63            | 0.69  |
