# Supplementary material for: The Mental Health Recovery Measure Can Be Used to Assess Aspects of Both Customer-Based and Service-Based Recovery in the Context of Severe Mental Illness
Source: PubMed Central journal article supplement (PMC5093119; doi:10.3389/fpsyg.2016.01679), 2016-11-03
Supplement: Table_5.pdf [file Table_5.pdf]

**Supplementary Table 5. Discriminant validity summary.**

MHRM scores were compared between age, education or disease duration categories, using unpaired t-tests – p-value (p) is reported.

| <b>Age</b>                 | <b>Older than 50 years old<br/>(n=46)</b> | <b>50 years or younger<br/>(n=49)</b> | <b>p</b> |
|----------------------------|-------------------------------------------|---------------------------------------|----------|
| MHRM-original (mean ± SEM) | 72.2 ± 13.7                               | 77.2 ± 16.4                           | 0.1      |
| MHRM-revised (mean ± SEM)  | 46.4 ± 11.7                               | 52.2 ± 12.6                           | 0.02     |
| <b>Education</b>           | <b>Primary or less<br/>(n=48)</b>         | <b>Higher than primary<br/>(n=47)</b> | <b>p</b> |
| MHRM-original (mean ± SEM) | 71.2 ± 13.9                               | 78.4 ± 15.8                           | 0.02     |
| MHRM-revised (mean ± SEM)  | 45.7 ± 11.7                               | 53.1 ± 12.2                           | 0.003    |
| <b>Duration of disease</b> | <b>More than 20 years<br/>(n=58)</b>      | <b>20 years or less (n=37)</b>        | <b>p</b> |
| MHRM-original (mean ± SEM) | 71.2 ± 13.6                               | 80.5 ± 16.1                           | 0.003    |
| MHRM-revised (mean ± SEM)  | 46.2 ± 11.4                               | 54.4 ± 12.5                           | 0.001    |
